# Supplementary material for: Comparison of Simulated Outcomes Between Stool- and Blood-Based Colorectal Cancer Screening Tests
Source: bioRxiv or medRxiv preprint supplement (doi:10.1101/2022.10.27.22281611), 2022-10-30
Supplement: Supplementary file [file media-1.pdf]

## Supplemental Material

**Table S1.** Estimated outcomes with blood-based and stool-based test under various adherence and blood-based test adenoma sensitivity scenarios.

| Screening Test | Adherence | Total COLs | CRC cases | CRC deaths | LY with CRC | LYG   | CRC incidence reduction | CRC mortality reduction |
|----------------|-----------|------------|-----------|------------|-------------|-------|-------------------------|-------------------------|
| No screening   | --        | 80.1       | 80.1      | 36.8       | 643.1       | 0.000 | 0.0%                    | 0.0%                    |
| mt-sDNA        | 30%       | 1084.2     | 40.1      | 15.5       | 402.8       | 248.1 | 50.0%                   | 57.8%                   |
|                | 40%       | 1208.4     | 36.6      | 13.9       | 375.1       | 269.1 | 54.3%                   | 62.2%                   |
|                | 50%       | 1299.0     | 34.3      | 12.8       | 356.2       | 284.1 | 57.2%                   | 65.3%                   |
|                | 60%       | 1371.7     | 32.6      | 12.0       | 343.1       | 292.6 | 59.3%                   | 67.4%                   |
|                | 70%       | 1428.2     | 31.4      | 11.4       | 332.4       | 299.6 | 60.8%                   | 68.9%                   |
|                | 100%      | 1546.9     | 28.9      | 10.3       | 311.3       | 313.2 | 64.0%                   | 71.9%                   |
|                | RW        | 1404.5     | 31.9      | 11.7       | 334.5       | 297.1 | 60.2%                   | 68.1%                   |
| FIT            | 30%       | 811.4      | 46.7      | 18.2       | 466.4       | 220.2 | 41.8%                   | 50.5%                   |
|                | 40%       | 972.7      | 40.8      | 15.3       | 424.9       | 254.2 | 49.1%                   | 58.4%                   |
|                | 50%       | 1102.8     | 36.7      | 13.3       | 391.3       | 278.8 | 54.3%                   | 63.8%                   |
|                | 60%       | 1229.3     | 33.2      | 11.8       | 361.9       | 295.8 | 58.5%                   | 68.0%                   |
|                | 70%       | 1321.5     | 30.9      | 10.9       | 339.6       | 308.1 | 61.5%                   | 70.5%                   |
|                | 100%      | 1585.5     | 25.6      | 8.7        | 286.9       | 333.1 | 68.0%                   | 76.2%                   |
|                | RW        | 1004.9     | 39.8      | 14.9       | 419.2       | 258.9 | 50.3%                   | 59.6%                   |
| FOBT           | 30%       | 647.0      | 57.2      | 22.6       | 562.8       | 174.5 | 28.6%                   | 38.7%                   |
|                | 40%       | 794.6      | 52.1      | 19.7       | 534.4       | 206.4 | 35.0%                   | 46.5%                   |
|                | 50%       | 923.9      | 47.7      | 17.5       | 507.1       | 232.3 | 40.5%                   | 52.3%                   |
|                | 60%       | 1040.4     | 44.1      | 15.6       | 485.1       | 256.6 | 44.9%                   | 57.6%                   |
|                | 70%       | 1148.8     | 40.8      | 14.2       | 457.0       | 273.9 | 49.0%                   | 61.3%                   |
|                | 100%      | 1426.6     | 33.8      | 11.2       | 392.8       | 306.6 | 57.8%                   | 69.5%                   |
|                | RW        | 698.3      | 55.3      | 21.6       | 551.5       | 185.1 | 30.9%                   | 41.4%                   |
| Blood, S1      | 30%       | 820.6      | 60.0      | 24.3       | 576.1       | 151.3 | 25.1%                   | 34.0%                   |
|                | 40%       | 938.5      | 57.0      | 22.5       | 563.0       | 172.9 | 28.9%                   | 38.9%                   |

|                                                          |             |        |      |      |       |       |       |       |
|----------------------------------------------------------|-------------|--------|------|------|-------|-------|-------|-------|
| <b>nAAS=10%</b><br><b>AAS=10%</b>                        | <b>50%</b>  | 1030.0 | 54.6 | 21.2 | 548.5 | 188.1 | 31.9% | 42.3% |
|                                                          | <b>60%</b>  | 1099.6 | 53.0 | 20.3 | 541.7 | 199.6 | 33.9% | 44.9% |
|                                                          | <b>70%</b>  | 1157.2 | 51.7 | 19.6 | 535.7 | 208.0 | 35.5% | 46.7% |
|                                                          | <b>100%</b> | 1285.8 | 48.7 | 17.9 | 519.1 | 227.5 | 39.2% | 51.3% |
| <b>Blood, S2</b><br><b>nAAS=12.5%</b><br><b>AAS= 15%</b> | <b>30%</b>  | 920.4  | 54.0 | 21.9 | 523.3 | 175.0 | 32.6% | 40.6% |
|                                                          | <b>40%</b>  | 1043.3 | 50.8 | 20.0 | 506.8 | 197.9 | 36.6% | 45.6% |
|                                                          | <b>50%</b>  | 1146.0 | 48.1 | 18.6 | 487.9 | 214.4 | 40.0% | 49.4% |
|                                                          | <b>60%</b>  | 1216.9 | 46.5 | 17.8 | 479.3 | 224.5 | 42.0% | 51.7% |
|                                                          | <b>70%</b>  | 1275.4 | 44.8 | 16.8 | 468.1 | 235.8 | 44.1% | 54.2% |
|                                                          | <b>100%</b> | 1405.9 | 41.7 | 15.3 | 447.3 | 253.8 | 48.0% | 58.4% |
| <b>Blood, S3</b><br><b>nAAS=15%</b><br><b>AAS= 15%</b>   | <b>30%</b>  | 967.2  | 52.3 | 21.1 | 509.2 | 183.4 | 34.7% | 42.7% |
|                                                          | <b>40%</b>  | 1101.9 | 48.5 | 19.1 | 487.0 | 206.8 | 39.5% | 48.0% |
|                                                          | <b>50%</b>  | 1194.8 | 46.1 | 17.9 | 471.0 | 221.6 | 42.5% | 51.4% |
|                                                          | <b>60%</b>  | 1268.3 | 43.9 | 16.8 | 456.0 | 234.1 | 45.2% | 54.5% |
|                                                          | <b>70%</b>  | 1339.8 | 42.3 | 16.0 | 445.9 | 242.9 | 47.2% | 56.4% |
|                                                          | <b>100%</b> | 1470.2 | 39.3 | 14.4 | 426.3 | 262.4 | 50.9% | 60.8% |
| <b>Blood, S4</b><br><b>nAAS=15%</b><br><b>AAS= 20%</b>   | <b>30%</b>  | 1003.7 | 49.1 | 19.8 | 479.1 | 196.4 | 38.7% | 46.1% |
|                                                          | <b>40%</b>  | 1134.9 | 45.6 | 17.9 | 460.1 | 219.7 | 43.1% | 51.4% |
|                                                          | <b>50%</b>  | 1239.0 | 43.0 | 16.7 | 439.5 | 234.4 | 46.3% | 54.6% |
|                                                          | <b>60%</b>  | 1316.4 | 40.9 | 15.5 | 424.0 | 247.7 | 49.0% | 57.8% |
|                                                          | <b>70%</b>  | 1369.6 | 39.5 | 14.9 | 414.3 | 256.3 | 50.7% | 59.4% |
|                                                          | <b>100%</b> | 1505.7 | 36.4 | 13.4 | 391.7 | 272.9 | 54.5% | 63.7% |
| <b>Blood, S5</b><br><b>nAAS=20%</b><br><b>AAS= 20%</b>   | <b>30%</b>  | 1089.2 | 45.5 | 18.2 | 451.3 | 212.5 | 43.2% | 50.5% |
|                                                          | <b>40%</b>  | 1231.3 | 41.8 | 16.4 | 425.7 | 234.1 | 47.8% | 55.5% |
|                                                          | <b>50%</b>  | 1334.8 | 39.1 | 15.0 | 407.3 | 250.4 | 51.2% | 59.2% |
|                                                          | <b>60%</b>  | 1409.7 | 37.3 | 14.2 | 392.4 | 261.4 | 53.5% | 61.5% |
|                                                          | <b>70%</b>  | 1472.6 | 35.7 | 13.4 | 380.2 | 270.2 | 55.4% | 63.5% |
|                                                          | <b>100%</b> | 1601.9 | 32.7 | 11.9 | 358.2 | 287.2 | 59.2% | 67.6% |

AAS, advanced adenoma ( $\geq 10$  mm) sensitivity; COL, colonoscopy; CRC, colorectal cancer; FIT, fecal immunochemical test; FOBT, fecal occult blood test; LY, life-years; LYG, life-years gained; mt-sDNA, multi-target stool DNA; nAAS, non-advanced adenoma ( $<10$  mm) sensitivity; RW, real-world; S, scenario.

**Table S2.** Estimated outcomes of sensitivity analyses with blood-based test under various adherence and expanded blood-based test adenoma sensitivity scenarios.

| Blood-test sensitivity             | Adherence | Total COLs | CRC cases | CRC deaths | LYG   | CRC Incidence reduction | CRC Mortality reduction |
|------------------------------------|-----------|------------|-----------|------------|-------|-------------------------|-------------------------|
| <b>nAAS=20%</b><br><b>AAS= 30%</b> | 30%       | 1147.4     | 41.4      | 16.5       | 231.3 | 48.3%                   | 55.1%                   |
|                                    | 40%       | 1279.0     | 37.7      | 14.7       | 252.6 | 53.0%                   | 59.9%                   |
|                                    | 50%       | 1382.9     | 35.0      | 13.5       | 268.5 | 56.4%                   | 63.3%                   |
|                                    | 60%       | 1462.4     | 33.0      | 12.6       | 278.8 | 58.8%                   | 65.8%                   |
|                                    | 70%       | 1521.6     | 31.6      | 11.9       | 287.4 | 60.6%                   | 67.7%                   |
|                                    | 100%      | 1647.9     | 29.0      | 10.9       | 300.7 | 63.8%                   | 70.5%                   |
| <b>nAAS=30%</b><br><b>AA= 30%</b>  | 30%       | 1288.7     | 36.1      | 14.4       | 253.1 | 54.9%                   | 60.8%                   |
|                                    | 40%       | 1426.9     | 32.3      | 12.6       | 272.6 | 59.7%                   | 65.7%                   |
|                                    | 50%       | 1526.3     | 29.9      | 11.5       | 287.9 | 62.7%                   | 68.8%                   |
|                                    | 60%       | 1602.3     | 28.0      | 10.7       | 298.4 | 65.0%                   | 71.0%                   |
|                                    | 70%       | 1665.2     | 26.9      | 10.1       | 305.6 | 66.4%                   | 72.6%                   |
|                                    | 100%      | 1788.0     | 24.6      | 9.1        | 317.9 | 69.3%                   | 75.2%                   |
| <b>nAAS=25%</b><br><b>AAS= 40%</b> | 30%       | 1263.3     | 35.3      | 14.2       | 256.7 | 55.9%                   | 61.5%                   |
|                                    | 40%       | 1399.2     | 31.7      | 12.4       | 278.6 | 60.4%                   | 66.3%                   |
|                                    | 50%       | 1499.4     | 29.2      | 11.2       | 293.3 | 63.5%                   | 69.5%                   |
|                                    | 60%       | 1568.1     | 27.8      | 10.7       | 300.3 | 65.3%                   | 71.0%                   |
|                                    | 70%       | 1629.4     | 26.7      | 10.1       | 307.5 | 66.7%                   | 72.6%                   |
|                                    | 100%      | 1747.3     | 24.5      | 9.2        | 319.8 | 69.4%                   | 75.1%                   |
| <b>nAAS=40%</b><br><b>AAS= 40%</b> | 30%       | 1430.8     | 29.5      | 11.8       | 281.9 | 63.2%                   | 68.1%                   |
|                                    | 40%       | 1563.1     | 26.2      | 10.1       | 301.7 | 67.3%                   | 72.4%                   |
|                                    | 50%       | 1662.6     | 23.9      | 9.2        | 313.7 | 70.1%                   | 74.9%                   |
|                                    | 60%       | 1731.1     | 22.6      | 8.6        | 320.3 | 71.8%                   | 76.5%                   |
|                                    | 70%       | 1790.6     | 21.8      | 8.2        | 325.9 | 72.8%                   | 77.6%                   |
|                                    | 100%      | 1905.7     | 20.3      | 7.5        | 336.7 | 74.7%                   | 79.5%                   |

AAS, advanced adenoma ( $\geq 10$  mm) sensitivity; COL, colonoscopy; CRC, colorectal cancer; LYG, life-years gained; nAAS, non-advanced adenoma ( $<10$  mm) sensitivity.

**Figure S1.** Colorectal cancer incidence reduction (IR) per 1,000 patients screened over lifetime horizon based on different adherence rates blood-based test adenoma sensitivity at A) 10% and B) 20%. Numbers represent ranges of incremental IR versus the blood-based test. A positive value (green) indicates the stool-based test has less IR than the blood-based test, and a negative value (red/orange) indicates the stool-based test has more IR than the blood-based test. Adherence rates ranged from 100% or 30-70% for both stool- and blood-tests. FIT, fecal immunochemical test; FOBT, fecal occult blood test; mt-sDNA, multi-target stool DNA.

A)

|            | Screening adherence rate | mt-sDNA |      |      |      |      |      | Blood IR |            | Screening adherence rate | FIT  |      |      |      |      |      | Blood IR |            | Screening adherence rate | FOBT |      |      |      |      |      | Blood IR |
|------------|--------------------------|---------|------|------|------|------|------|----------|------------|--------------------------|------|------|------|------|------|------|----------|------------|--------------------------|------|------|------|------|------|------|----------|
|            |                          | 30%     | 40%  | 50%  | 60%  | 70%  | 100% |          |            |                          | 30%  | 40%  | 50%  | 60%  | 70%  | 100% |          |            |                          | 30%  | 40%  | 50%  | 60%  | 70%  | 100% |          |
| Blood Test | 30%                      | -25%    | -29% | -32% | -34% | -36% | -39% | 25%      | Blood Test | 30%                      | -17% | -24% | -29% | -33% | -36% | -43% | 25%      | Blood Test | 30%                      | -4%  | -10% | -15% | -20% | -24% | -33% | 25%      |
|            | 40%                      | -21%    | -25% | -28% | -30% | -32% | -35% | 29%      |            | 40%                      | -13% | -20% | -25% | -30% | -33% | -39% | 29%      |            | 40%                      | 0%   | -6%  | -12% | -16% | -20% | -29% | 29%      |
|            | 50%                      | -18%    | -22% | -25% | -27% | -29% | -32% | 32%      |            | 50%                      | -10% | -17% | -22% | -27% | -30% | -36% | 32%      |            | 50%                      | 3%   | -3%  | -9%  | -13% | -17% | -26% | 32%      |
|            | 60%                      | -16%    | -20% | -23% | -25% | -27% | -30% | 34%      |            | 60%                      | -8%  | -15% | -20% | -25% | -28% | -34% | 34%      |            | 60%                      | 5%   | -1%  | -7%  | -11% | -15% | -24% | 34%      |
|            | 70%                      | -14%    | -19% | -22% | -24% | -25% | -29% | 35%      |            | 70%                      | -6%  | -14% | -19% | -23% | -26% | -33% | 35%      |            | 70%                      | 7%   | 0%   | -5%  | -9%  | -14% | -22% | 35%      |
|            | 100%                     | -11%    | -15% | -18% | -20% | -22% | -25% | 39%      |            | 100%                     | -3%  | -10% | -15% | -19% | -22% | -29% | 39%      |            | 100%                     | 11%  | 4%   | -1%  | -6%  | -10% | -19% | 39%      |
| mt-sDNA IR |                          | 50%     | 54%  | 57%  | 59%  | 61%  | 64%  |          | FIT IR     |                          | 42%  | 49%  | 54%  | 59%  | 61%  | 68%  |          | FOBT IR    |                          | 29%  | 35%  | 41%  | 45%  | 49%  | 58%  |          |

B)

|            | Screening adherence rate | mt-sDNA |      |      |      |      |      | Blood IR |            | Screening adherence rate | FIT |     |      |      |      |      | Blood IR |            | Screening adherence rate | FOBT |     |     |     |     |      | Blood IR |
|------------|--------------------------|---------|------|------|------|------|------|----------|------------|--------------------------|-----|-----|------|------|------|------|----------|------------|--------------------------|------|-----|-----|-----|-----|------|----------|
|            |                          | 30%     | 40%  | 50%  | 60%  | 70%  | 100% |          |            |                          | 30% | 40% | 50%  | 60%  | 70%  | 100% |          |            |                          | 30%  | 40% | 50% | 60% | 70% | 100% |          |
| Blood Test | 30%                      | -7%     | -11% | -14% | -16% | -18% | -21% | 43%      | Blood Test | 30%                      | 1%  | -6% | -11% | -15% | -18% | -25% | 43%      | Blood Test | 30%                      | 15%  | 8%  | 3%  | -2% | -6% | -15% | 43%      |
|            | 40%                      | -2%     | -6%  | -9%  | -11% | -13% | -16% | 48%      |            | 40%                      | 6%  | -1% | -6%  | -11% | -14% | -20% | 48%      |            | 40%                      | 19%  | 13% | 7%  | 3%  | -1% | -10% | 48%      |
|            | 50%                      | 1%      | -3%  | -6%  | -8%  | -10% | -13% | 51%      |            | 50%                      | 9%  | 2%  | -3%  | -7%  | -10% | -17% | 51%      |            | 50%                      | 23%  | 16% | 11% | 6%  | 2%  | -7%  | 51%      |
|            | 60%                      | 4%      | -1%  | -4%  | -6%  | -7%  | -10% | 53%      |            | 60%                      | 12% | 4%  | -1%  | -5%  | -8%  | -15% | 53%      |            | 60%                      | 25%  | 18% | 13% | 9%  | 4%  | -4%  | 53%      |
|            | 70%                      | 5%      | 1%   | -2%  | -4%  | -5%  | -9%  | 55%      |            | 70%                      | 14% | 6%  | 1%   | -3%  | -6%  | -13% | 55%      |            | 70%                      | 27%  | 20% | 15% | 10% | 6%  | -2%  | 55%      |
|            | 100%                     | 9%      | 5%   | 2%   | 0%   | -2%  | -5%  | 59%      |            | 100%                     | 17% | 10% | 5%   | 1%   | -2%  | -9%  | 59%      |            | 100%                     | 31%  | 24% | 19% | 14% | 10% | 1%   | 59%      |
| mt-sDNA IR |                          | 50%     | 54%  | 57%  | 59%  | 61%  | 64%  |          | FIT IR     |                          | 42% | 49% | 54%  | 59%  | 61%  | 68%  |          | FOBT IR    |                          | 29%  | 35% | 41% | 45% | 49% | 58%  |          |

**Figure S2.** Colorectal cancer mortality reduction (MR) per 1,000 patients screened over lifetime horizon based on different adherence rates for blood-based test adenoma sensitivity at A) 10% and B) 20%. Numbers represent ranges of incremental MR versus the blood-based test. A positive value (green) indicates the stool-based test has less MR than the blood-based test, and a negative value (red/orange) indicates the stool-based test has more MR than the blood-based test. Adherence rates ranged from 100% or 30-70% for both stool- and blood-tests. FIT, fecal immunochemical test; FOBT, fecal occult blood test; mt-sDNA, multi-target stool DNA.

A)

|                          |      | mt-sDNA |      |      |      |      |      | Blood MR |
|--------------------------|------|---------|------|------|------|------|------|----------|
| Screening adherence rate |      | 30%     | 40%  | 50%  | 60%  | 70%  | 100% |          |
| Blood Test               | 30%  | -24%    | -28% | -31% | -33% | -35% | -38% | 34%      |
|                          | 40%  | -19%    | -23% | -26% | -29% | -30% | -33% | 39%      |
|                          | 50%  | -16%    | -20% | -23% | -25% | -27% | -30% | 42%      |
|                          | 60%  | -13%    | -17% | -20% | -22% | -24% | -27% | 45%      |
|                          | 70%  | -11%    | -16% | -19% | -21% | -22% | -25% | 47%      |
|                          | 100% | -7%     | -11% | -14% | -16% | -18% | -21% | 51%      |
| mt-sDNA MR               |      | 58%     | 62%  | 65%  | 67%  | 69%  | 72%  |          |

|                          |      | FIT  |      |      |      |      |      | Blood MR |
|--------------------------|------|------|------|------|------|------|------|----------|
| Screening adherence rate |      | 30%  | 40%  | 50%  | 60%  | 70%  | 100% |          |
| Blood Test               | 30%  | -17% | -24% | -30% | -34% | -36% | -42% | 34%      |
|                          | 40%  | -12% | -19% | -25% | -29% | -32% | -37% | 39%      |
|                          | 50%  | -8%  | -16% | -22% | -26% | -28% | -34% | 42%      |
|                          | 60%  | -6%  | -13% | -19% | -23% | -26% | -31% | 45%      |
|                          | 70%  | -4%  | -12% | -17% | -21% | -24% | -30% | 47%      |
|                          | 100% | 1%   | -7%  | -13% | -17% | -19% | -25% | 51%      |
| FIT MR                   |      | 50%  | 58%  | 64%  | 68%  | 70%  | 76%  |          |

|                          |      | FOBT |      |      |      |      |      | Blood MR |
|--------------------------|------|------|------|------|------|------|------|----------|
| Screening adherence rate |      | 30%  | 40%  | 50%  | 60%  | 70%  | 100% |          |
| Blood Test               | 30%  | -5%  | -12% | -18% | -24% | -27% | -35% | 34%      |
|                          | 40%  | 0%   | -8%  | -13% | -19% | -22% | -31% | 39%      |
|                          | 50%  | 4%   | -4%  | -10% | -15% | -19% | -27% | 42%      |
|                          | 60%  | 6%   | -2%  | -7%  | -13% | -16% | -25% | 45%      |
|                          | 70%  | 8%   | 0%   | -6%  | -11% | -15% | -23% | 47%      |
|                          | 100% | 13%  | 5%   | -1%  | -6%  | -10% | -18% | 51%      |
| FOBT MR                  |      | 39%  | 46%  | 52%  | 58%  | 61%  | 69%  |          |

B)

|                          |      | mt-sDNA |      |      |      |      |      | Blood MR |
|--------------------------|------|---------|------|------|------|------|------|----------|
| Screening adherence rate |      | 30%     | 40%  | 50%  | 60%  | 70%  | 100% |          |
| Blood Test               | 30%  | -7%     | -12% | -15% | -17% | -18% | -21% | 50%      |
|                          | 40%  | -2%     | -7%  | -10% | -12% | -13% | -16% | 55%      |
|                          | 50%  | 1%      | -3%  | -6%  | -8%  | -10% | -13% | 59%      |
|                          | 60%  | 4%      | -1%  | -4%  | -6%  | -7%  | -10% | 62%      |
|                          | 70%  | 6%      | 1%   | -2%  | -4%  | -5%  | -8%  | 63%      |
|                          | 100% | 10%     | 5%   | 2%   | 0%   | -1%  | -4%  | 68%      |
| mt-sDNA MR               |      | 58%     | 62%  | 65%  | 67%  | 69%  | 72%  |          |

|                          |      | FIT |     |      |      |      |      | Blood MR |
|--------------------------|------|-----|-----|------|------|------|------|----------|
| Screening adherence rate |      | 30% | 40% | 50%  | 60%  | 70%  | 100% |          |
| Blood Test               | 30%  | 0%  | -8% | -13% | -17% | -20% | -26% | 50%      |
|                          | 40%  | 5%  | -3% | -8%  | -12% | -15% | -21% | 55%      |
|                          | 50%  | 9%  | 1%  | -5%  | -9%  | -11% | -17% | 59%      |
|                          | 60%  | 11% | 3%  | -2%  | -6%  | -9%  | -15% | 62%      |
|                          | 70%  | 13% | 5%  | 0%   | -4%  | -7%  | -13% | 63%      |
|                          | 100% | 17% | 9%  | 4%   | 0%   | -3%  | -9%  | 68%      |
| FIT MR                   |      | 50% | 58% | 64%  | 68%  | 70%  | 76%  |          |

|                          |      | FOBT |     |     |     |      |      | Blood MR |
|--------------------------|------|------|-----|-----|-----|------|------|----------|
| Screening adherence rate |      | 30%  | 40% | 50% | 60% | 70%  | 100% |          |
| Blood Test               | 30%  | 12%  | 4%  | -2% | -7% | -11% | -19% | 50%      |
|                          | 40%  | 17%  | 9%  | 3%  | -2% | -6%  | -14% | 55%      |
|                          | 50%  | 20%  | 13% | 7%  | 2%  | -2%  | -10% | 59%      |
|                          | 60%  | 23%  | 15% | 9%  | 4%  | 0%   | -8%  | 62%      |
|                          | 70%  | 25%  | 17% | 11% | 6%  | 2%   | -6%  | 63%      |
|                          | 100% | 29%  | 21% | 15% | 10% | 6%   | -2%  | 68%      |
| FOBT MR                  |      | 39%  | 46% | 52% | 58% | 61%  | 69%  |          |
